# Supplementary material for: Extracorporeal Carbon Dioxide Removal With the Hemolung in Patients With Acute Respiratory Failure: A Multicenter Retrospective Cohort Study*
Source: PubMed Central journal article supplement — Crit Care Med. 2023 Mar 21;51(7):892–902. doi: 10.1097/CCM.0000000000005845 (PMC10262985; doi:10.1097/ccm.0000000000005845), 2023-03-21
Supplement: ccm-51-892-s001.pdf [file ccm-51-892-s001.pdf]

## SUPPLEMENTAL DIGITAL CONTENT

**Supplemental Figure 1: Study profile**

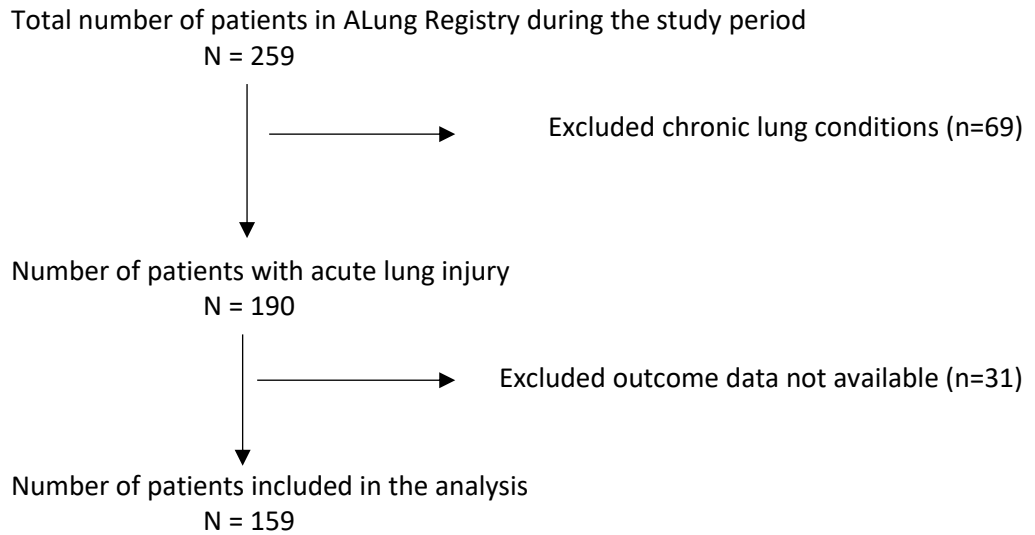

Supplemental Figure 2: ROC curve of the final model

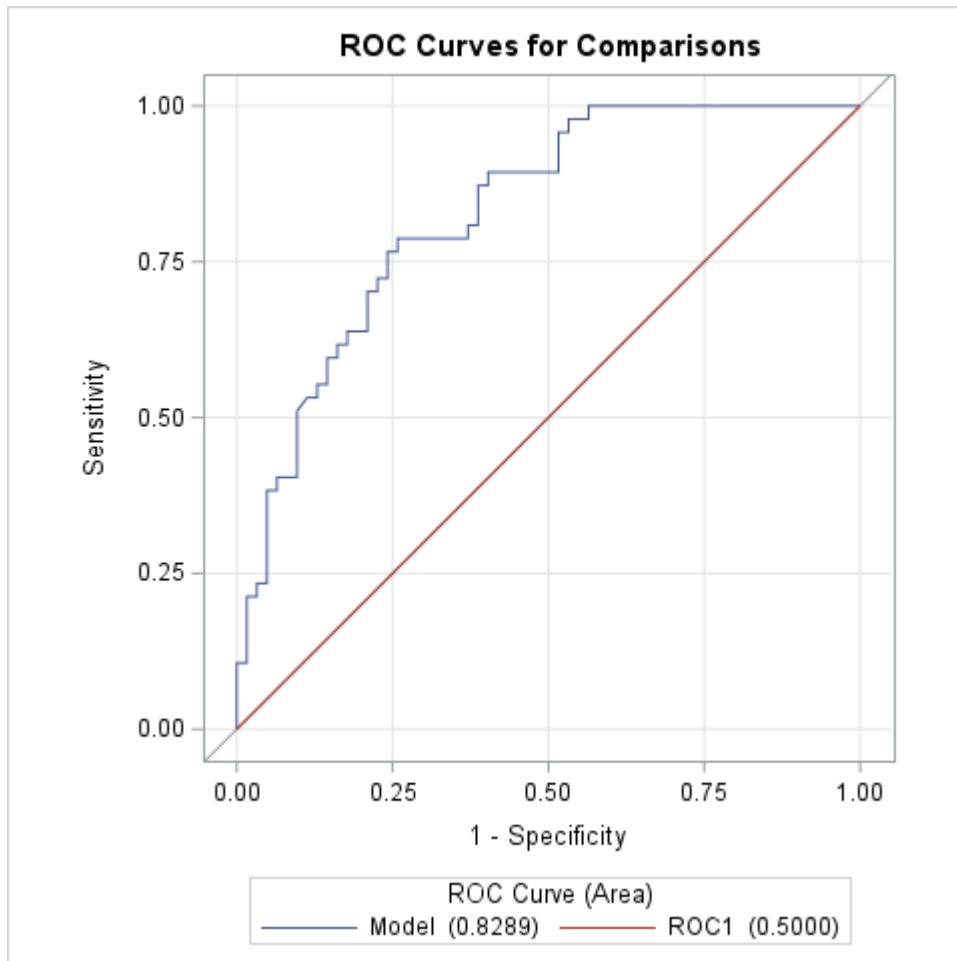

**Supplemental Table 1: Estimated mean changes in pH, PaCO<sub>2</sub>, respiratory rate, tidal volume, minute ventilation, peak inspiratory and PEEP before initiation and at successive time points.**

| pH                                                    |     |          |             |             | Change in pH post Hemolung RAS initiation  |          |             |             |         |
|-------------------------------------------------------|-----|----------|-------------|-------------|--------------------------------------------|----------|-------------|-------------|---------|
| Variable                                              | N   | Estimate | Lower bound | Upper bound | N                                          | Estimate | Lower bound | Upper bound | P Value |
| Pre-Hemolung                                          | 155 | 7.23     | 7.21        | 7.25        | .                                          | .        | .           | .           | .       |
| 0-4                                                   | 62  | 7.29     | 7.27        | 7.32        | 60                                         | 0.05     | 0.03        | 0.08        | <.001   |
| 4-8                                                   | 112 | 7.32     | 7.30        | 7.34        | 110                                        | 0.10     | 0.08        | 0.12        | <.001   |
| 8-16                                                  | 65  | 7.32     | 7.30        | 7.35        | 63                                         | 0.09     | 0.06        | 0.12        | <.001   |
| 16-35                                                 | 128 | 7.34     | 7.33        | 7.36        | 126                                        | 0.12     | 0.09        | 0.14        | <.001   |
| PaCO <sub>2</sub> [mmHg]                              |     |          |             |             | Change in PaCO <sub>2</sub>                |          |             |             |         |
| Pre-Hemolung                                          | 155 | 77.24    | 73.34       | 81.13       | .                                          | .        | .           | .           | .       |
| 0-4                                                   | 62  | 66.25    | 61.74       | 70.76       | 60                                         | -9.35    | -13.35      | -5.36       | <.001   |
| 4-8                                                   | 112 | 59.27    | 56.33       | 62.21       | 110                                        | -19.65   | -23.89      | -15.41      | <.001   |
| 8-16                                                  | 65  | 63.00    | 58.89       | 67.11       | 63                                         | -12.92   | -16.86      | -8.98       | <.001   |
| 16-35                                                 | 128 | 57.62    | 55.05       | 60.19       | 126                                        | -21.02   | -25.36      | -16.67      | <.001   |
| Respiratory Rate [l/min]                              |     |          |             |             | Change in Respiratory Rate                 |          |             |             |         |
| Pre-Hemolung                                          | 142 | 26.59    | 25.40       | 27.79       | .                                          | .        | .           | .           | .       |
| 0-4                                                   | 57  | 26.97    | 25.09       | 28.85       | 54                                         | -0.92    | -2.39       | 0.55        | 0.213   |
| 4-8                                                   | 102 | 24.12    | 22.48       | 25.76       | 99                                         | -2.05    | -3.29       | -0.81       | 0.001   |
| 8-16                                                  | 63  | 26.46    | 24.93       | 27.99       | 61                                         | -0.97    | -2.64       | 0.71        | 0.253   |
| 16-35                                                 | 119 | 24.30    | 23.00       | 25.60       | 110                                        | -2.23    | -3.62       | -0.85       | 0.002   |
| Tidal Volume [mL]                                     |     |          |             |             | Change in tidal volume                     |          |             |             |         |
| Pre-Hemolung                                          | 132 | 396.20   | 374.49      | 417.91      | .                                          | .        | .           | .           | .       |
| 0-4                                                   | 47  | 364.79   | 330.30      | 399.28      | 41                                         | -47.80   | -67.27      | -28.34      | <.001   |
| 4-8                                                   | 93  | 364.37   | 341.30      | 387.43      | 89                                         | -22.27   | -41.19      | -3.36       | 0.022   |
| 8-16                                                  | 54  | 376.41   | 345.03      | 407.78      | 48                                         | -22.80   | -49.66      | 4.06        | 0.094   |
| 16-35                                                 | 109 | 383.25   | 361.59      | 404.92      | 99                                         | -16.34   | -37.75      | 5.08        | 0.133   |
| Minute ventilation [L/min]                            |     |          |             |             | Change in minute ventilation               |          |             |             |         |
| Pre-Hemolung                                          | 132 | 10.36    | 9.71        | 11.01       | .                                          | .        | .           | .           | .       |
| 0-4                                                   | 48  | 9.76     | 8.52        | 10.99       | 42                                         | -1.88    | -2.71       | -1.05       | <.001   |
| 4-8                                                   | 96  | 8.43     | 7.80        | 9.05        | 92                                         | -1.61    | -2.26       | -0.96       | <.001   |
| 8-16                                                  | 55  | 9.49     | 8.51        | 10.48       | 49                                         | -1.32    | -2.44       | -0.21       | 0.021   |
| 16-35                                                 | 112 | 8.79     | 8.21        | 9.37        | 102                                        | -1.42    | -2.07       | -0.78       | <.001   |
| Peak inspiratory pressure [cmH <sub>2</sub> O]        |     |          |             |             | Change in peak inspiratory pressure        |          |             |             |         |
| Pre-Hemolung                                          | 100 | 32.32    | 30.24       | 34.40       | .                                          | .        | .           | .           | .       |
| 4-8                                                   | 81  | 30.12    | 28.01       | 32.22       | 67                                         | -2.78    | -4.59       | -0.96       | 0.003   |
| 16-35                                                 | 91  | 29.11    | 27.39       | 30.84       | 68                                         | -3.44    | -5.33       | -1.56       | <.001   |
| Positive end expiratory pressure [cmH <sub>2</sub> O] |     |          |             |             | Change in positive end expiratory pressure |          |             |             |         |
| Pre-Hemolung                                          | 140 | 10.23    | 9.47        | 10.99       | .                                          | .        | .           | .           | .       |
| 4-8                                                   | 102 | 10.01    | 9.10        | 10.92       | 97                                         | -0.24    | -0.67       | 0.19        | 0.269   |
| 16-35                                                 | 117 | 10.07    | 9.28        | 10.85       | 109                                        | -0.12    | -0.64       | 0.41        | 0.654   |

**Supplemental Table 2 Comparison of CO<sub>2</sub> removal, changes in PaCO<sub>2</sub>, pH and reduction of ventilation between survivors to those died.**

|                                        | Survived to ICU discharge<br>N=65 | Died in ICU N=94     | P Value             |
|----------------------------------------|-----------------------------------|----------------------|---------------------|
| <b>CO<sub>2</sub> removal [mL/min]</b> |                                   |                      |                     |
| 0 to <4 hours                          | 85.2 (72.5, 97.0)                 | 87.6 (75.3, 101.7)   | 0.4529 <sup>1</sup> |
| 4 to < 8 hours                         | 83.0 (73.3, 94.0)                 | 85.8 (72.0, 100.2)   | 0.5563 <sup>1</sup> |
| 8 to < 16 hours                        |                                   |                      |                     |
| 16 to 35 hours                         | 84.0 (74.0, 93.0)                 | 84.1 (75.9, 95.0)    | 0.4884 <sup>1</sup> |
| <b>Blood flow [mL/min]</b>             |                                   |                      |                     |
| 0 to < 4 hours                         | 451.4 (427.1, 491.6)              | 444.1 (379.8, 495.2) | 0.2087 <sup>1</sup> |
| 4 to < 8 hours                         | 465.9 (424.5, 497.2)              | 440.0 (400.0, 495.1) | 0.0983 <sup>1</sup> |
| 8 to < 16 hours                        |                                   |                      |                     |
| 16 to 35 hours                         | 464.5 (418.0, 492.2)              | 452.2 (404.4, 508.8) | 0.8928 <sup>1</sup> |
| <b>pH</b>                              |                                   |                      |                     |
| Prior to initiation of Hemolung<br>RAS | 7.3 (7.2, 7.3)                    | 7.2 (7.2, 7.3)       | 0.3067 <sup>1</sup> |
| 0 to < 4 hours                         | 7.3 (7.2, 7.4)                    | 7.3 (7.2, 7.4)       | 1.0000 <sup>1</sup> |
| 4 to < 8 hours                         | 7.3 (7.3, 7.4)                    | 7.3 (7.2, 7.4)       | 0.1250 <sup>1</sup> |
| 8 to < 16 hours                        | 7.3 (7.3, 7.4)                    | 7.3 (7.2, 7.4)       | 0.6169 <sup>1</sup> |
| 16 to 35 hours                         | 7.4 (7.3, 7.4)                    | 7.3 (7.3, 7.4)       | 0.0703 <sup>1</sup> |
| <b>PCO<sub>2</sub> [mmHg]</b>          |                                   |                      |                     |
| Prior to initiation of Hemolung<br>RAS | 70.0 (59.5, 88.0)                 | 75.9 (62.6, 91.0)    | 0.37791             |
| 0 to < 4 hours                         | 62.7 (54.9, 78.0)                 | 59.1 (50.5, 84.0)    | 0.8006 <sup>1</sup> |
| 4 to < 8 hours                         | 54.0 (45.0, 66.8)                 | 61.0 (48.6, 70.2)    | 0.16611             |
| 8 to < 16 hours                        | 60.2 (51.4, 83.2)                 | 58.7 (50.7, 69.0)    | 0.5705 <sup>1</sup> |
| 16 to 35 hours                         | 54.0 (46.2, 61.5)                 | 57.0 (46.9, 64.4)    | 0.5480 <sup>1</sup> |
| <b>PIP [cmH<sub>2</sub>O]</b>          |                                   |                      |                     |
| Prior to initiation of Hemolung<br>RAS | 30.0 (28.0, 34.0)                 | 32.0 (30.0, 38.0)    | 0.0736 <sup>1</sup> |
| 4 to < 8 hours                         | 28.0 (25.0, 32.0)                 | 30.0 (27.0, 34.0)    | 0.1272 <sup>1</sup> |
| 16 to 35 hours                         | 28.0 (25.0, 32.0)                 | 28.3 (26.0, 34.0)    | 0.5033 <sup>1</sup> |
| <b>Tidal volumes [mL]</b>              |                                   |                      |                     |
| Prior to initiation of Hemolung<br>RAS | 400.0 (320.0, 483.0)              | 380.0 (315.0, 450.0) | 0.2439 <sup>1</sup> |
| 0 to < 4 hours                         | 400.0 (332.0, 420.0)              | 380.0 (250.0, 455.0) | 0.3979 <sup>1</sup> |
| 4 to < 8 hours                         | 400.0 (320.0, 478.0)              | 336.0 (265.0, 404.0) | 0.0105 <sup>1</sup> |
| 8 to < 16 hours                        | 400.0 (361.5, 480.0)              | 380.0 (284.0, 450.0) | 0.4771 <sup>1</sup> |
| 16 to 35 hours                         | 405.0 (330.0, 462.0)              | 370.0 (286.0, 450.0) | 0.1033 <sup>1</sup> |
| <b>Minute ventilation [mL/min]</b>     |                                   |                      |                     |

|                                     |                  |                  |                     |
|-------------------------------------|------------------|------------------|---------------------|
| Prior to initiation of Hemolung RAS | 10.0 (7.1, 12.0) | 10.5 (8.2, 13.3) | 0.1850 <sup>1</sup> |
| 0 to < 4 hours                      | 8.0 (4.2, 11.7)  | 9.7 (7.3, 13.3)  | 0.3465 <sup>1</sup> |
| 4 to < 8 hours                      | 8.0 (6.3, 9.8)   | 9.0 (6.4, 10.2)  | 0.1843 <sup>1</sup> |
| 8 to < 16 hours                     | 9.8 (5.6, 12.8)  | 9.0 (6.8, 11.2)  | 0.8312 <sup>1</sup> |

<sup>1</sup>Wilcoxon rank sum p-value;
